# Supplementary material
Source: publisher figshare collection journal article supplement (https://diabetesjournals.figshare.com/articles/dataset/_/20387091)
Supplement: Supplementary file 1 [file 1]

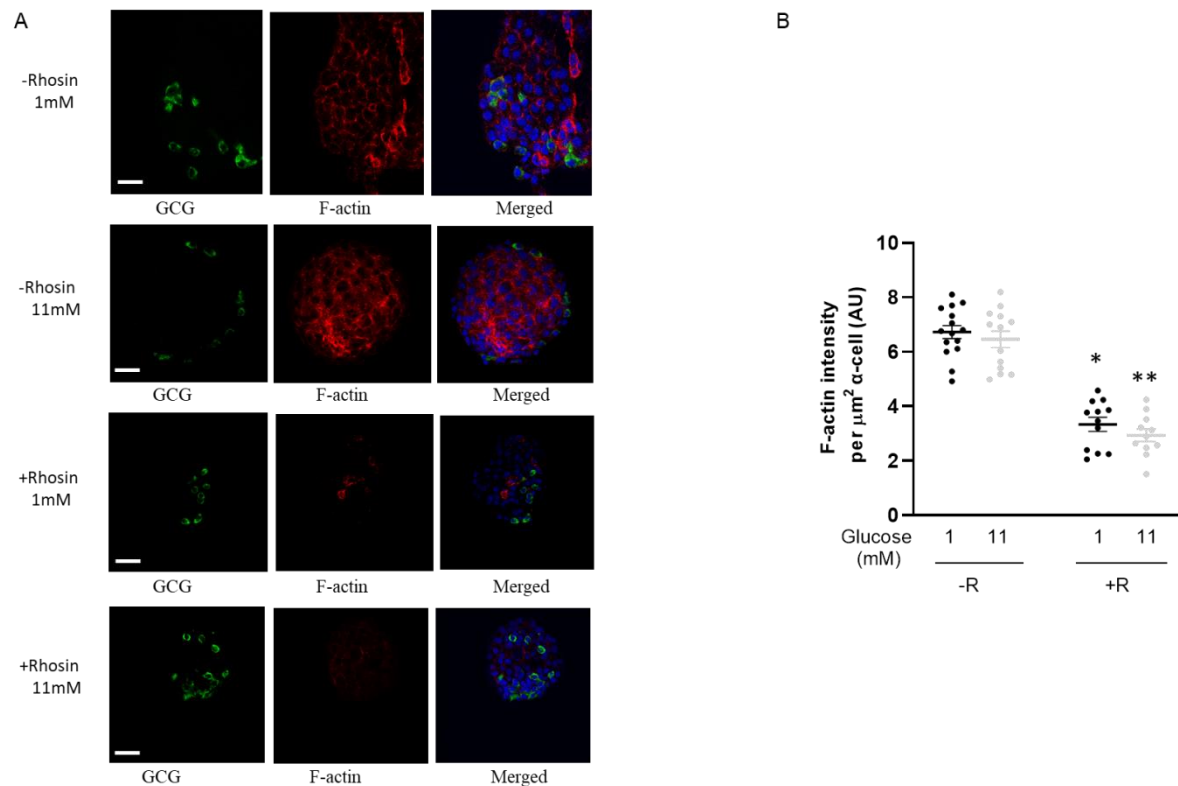

**Supplementary Figure 1.** RhoA inhibition in isolated islets dramatically reduced F-actin intensities in both 1 mM and 11 mM glucose conditions. A) Confocal immunofluorescent images (20  $\mu$ m scale bars) of glucagon- and F-actin-stained isolated islets in low glucose (1 mM) versus high glucose (11 mM) conditions in the absence and presence of Rhosin. B) F-actin intensities of  $\alpha$ -cells in isolated islets in response to Rhosin in low and high glucose conditions. Statistical difference between Rhosin-treated and control islets at the same glucose concentration was determined using unpaired t-test (\* $p<0.05$ ; \*\* $p<0.001$ ). Values expressed as mean  $\pm$  SEM ( $n = 11$ -15 islets).

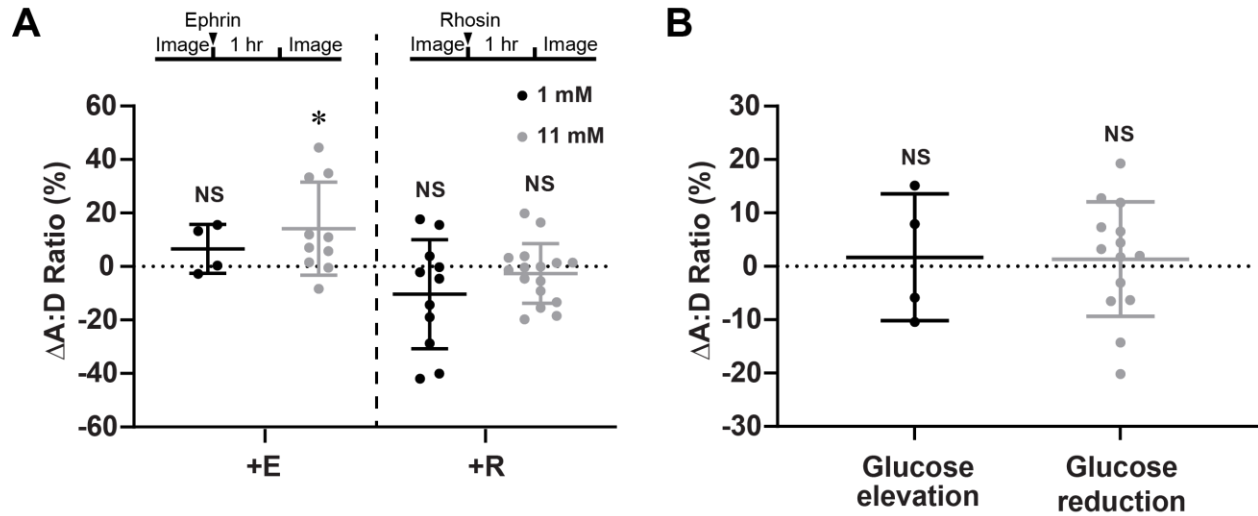

**Supplementary Figure 2.** EphA forward signaling stimulates  $\alpha$ -cell RhoA activity in intact mouse islets. A) The % changes in the acceptor:donor intensity ratio before and after treatment (either with 4  $\mu$ g/mL ephrin-A5-Fc (+E) or 250  $\mu$ M Rhosin (+R)) at low (black circles) and high (gray circles) glucose concentrations. B) The % changes in the acceptor:donor intensity ratio on switching glucose concentrations from 1 mM to 11 mM (Glucose elevation, black circles) and 11 mM to 1 mM (Glucose reduction, gray circles). Data presented as mean  $\pm$  SD ( $n \geq 4$  cells). One sample t-test was employed to determine statistical significance between no treatment value (0% change in acceptor:donor intensity ratio) and treatment conditions. \*:  $p < 0.05$ ; NS:  $p > 0.05$ .

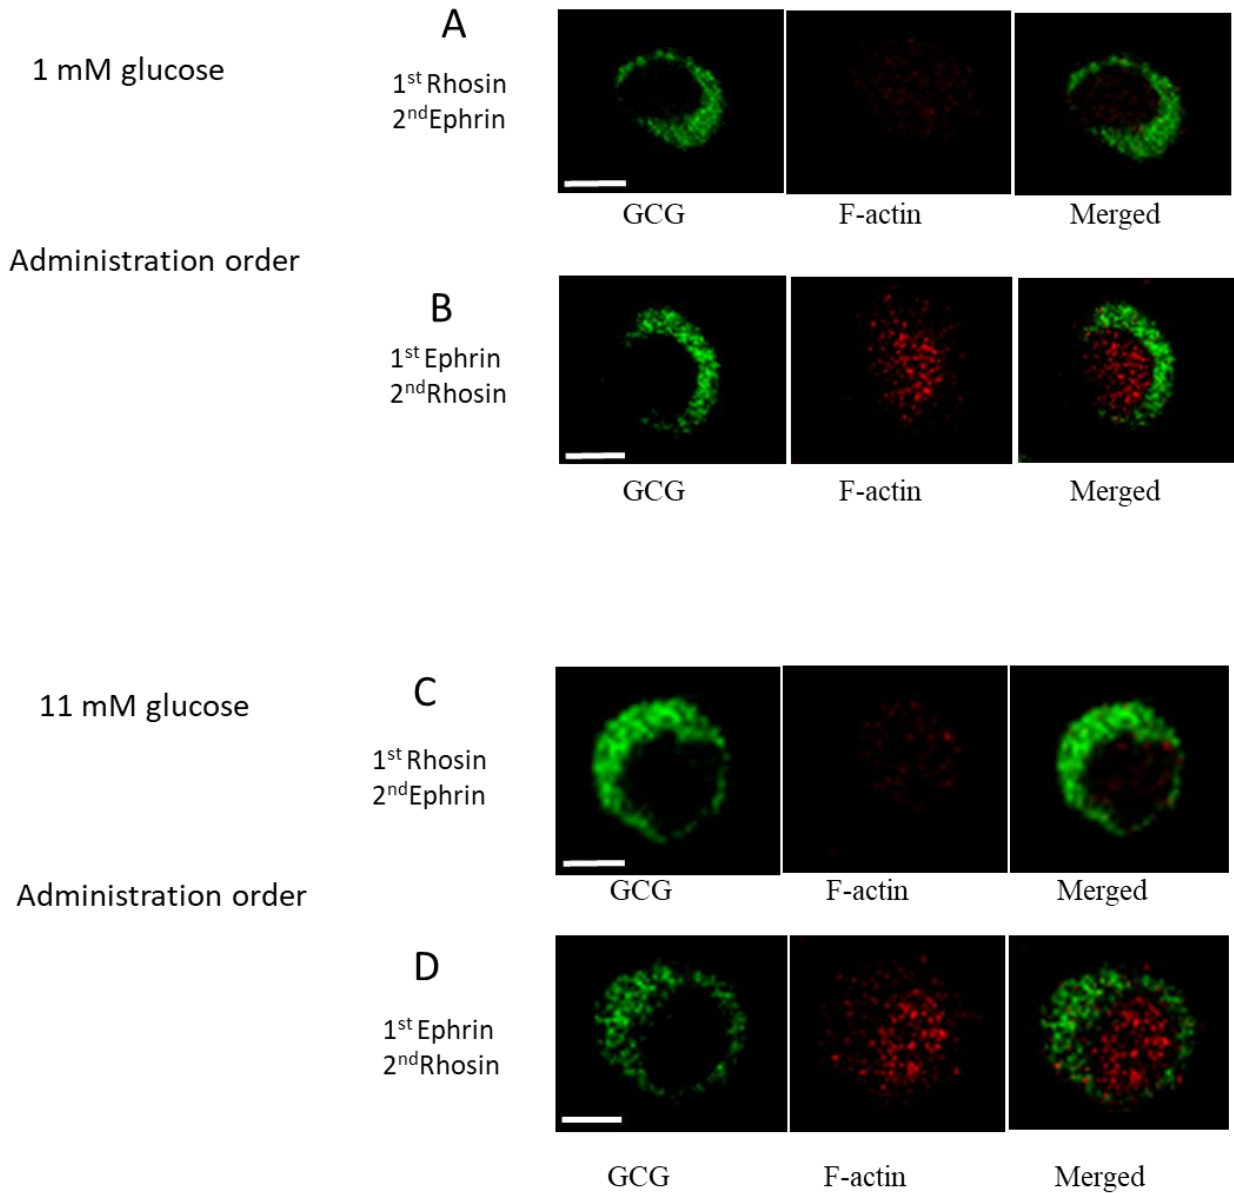

**Supplementary Figure 3.** Ephrin-A5 prevents Rhosin-imposed depolymerization of F-actin in dispersed mouse islet cells. Dispersed islet cells were treated in a sequential order with Rhosin (+R; 100  $\mu$ M) – ephrin-A5-Fc (E; 4  $\mu$ g/mL) (Rhosin-Ephrin) or in a reverse order. Confocal immunofluorescent images (10  $\mu$ m scale bars) represent a typical  $\alpha$ -cell when treated in sequential order of Rhosin-Ephrin (**A**) or Ephrin-Rhosin (**B**) in low glucose (1 mM) condition and Rhosin-Ephrin (**C**) or Ephrin-Rhosin (**D**) in high glucose (11 mM) condition. Data quantified in Figure 3 M and N.
